# Supplementary material
Source: Springer Nature journal article supplement (https://www.springermedizin.de/resource/supplementary/12889_2006_445_MOESM3_ESM.pdf/9500890)

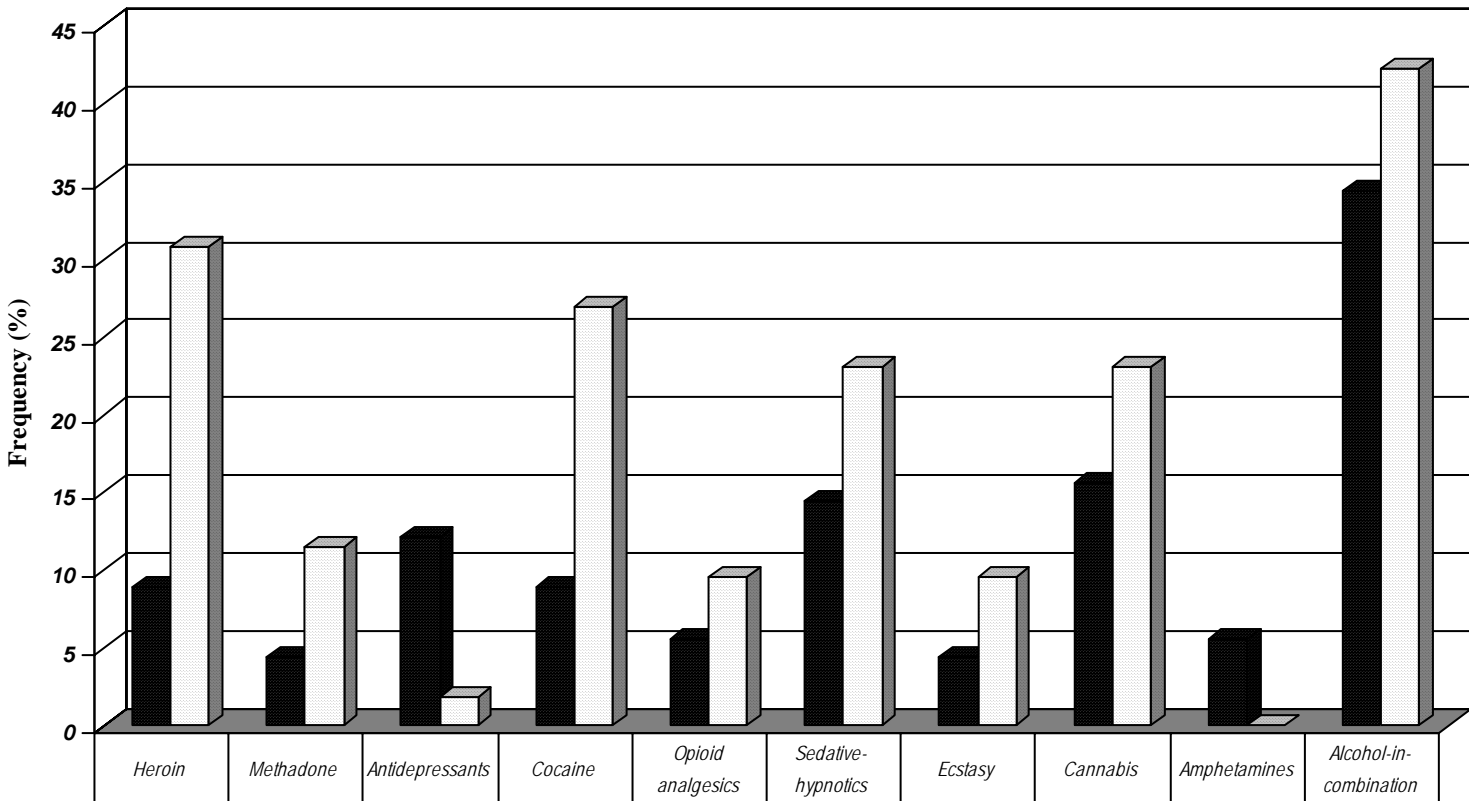

|                          |      |      |      |      |     |      |     |      |     |      |
|--------------------------|------|------|------|------|-----|------|-----|------|-----|------|
| ■ Intentional (N = 90)   | 8.9  | 4.4  | 12.2 | 8.9  | 5.6 | 14.4 | 4.4 | 15.6 | 5.6 | 34.4 |
| □ Unintentional (N = 51) | 30.8 | 11.5 | 1.9  | 26.9 | 9.6 | 23.1 | 9.6 | 23.1 | 0   | 42.3 |

Supplement: MOESM3 [file 9500890]
